# Supplementary material for: A novel solid oxide redox flow battery for grid energy storage
Source: Royal Society of Chemistry journal article supplement (doi:10.1039/c1ee02489b), 2011-01-01
Supplement: c1ee02489b.pdf [file c1ee02489b.pdf]

## Electronic Supplementary Information

### Preparation of Fe-based redox couple material

The functional redox material stored in the redox cycle unit consists of a mixture of Fe<sub>2</sub>O<sub>3</sub> and ZrO<sub>2</sub> powders in a molar ratio of *ca.* 85:15. The role of ZrO<sub>2</sub> is to mitigate the coarsening of Fe-particles during repeated redox cycles. The nanosize powders of Fe<sub>2</sub>O<sub>3</sub> and ZrO<sub>2</sub> were prepared by co-precipitating 0.1 M of aqueous solution containing Fe(NO<sub>3</sub>)<sub>3</sub>·9H<sub>2</sub>O (Alfa Aesar, 98.0-101.0%) and ZrO(NO<sub>3</sub>)<sub>2</sub>·xH<sub>2</sub>O (Alfa Aesar, 99.9%) with (NH<sub>4</sub>)<sub>2</sub>CO<sub>3</sub>. The molar ratio was kept as  $n_{(\text{NH}_4)_2\text{CO}_3} : n_{\text{M}^{n+}} = 2.5:1$ , where M represents the combined Fe and Zr. The obtained co-precipitate was then filtered, washed, dried, ground and finally calcined at 600 °C for 2 h to convert it into the oxides. The decomposed oxide powders were then ball-milled to break up the agglomerates, followed by mixing with a microcrystalline cellulose pore-former (type NT-013, FMC Corp.) in a volume ratio of 1:1. The final CLB pellets were made by pressing the powder into Φ1/2” pellets and sintering at 1000°C for 1 h. All heat treatments were conducted in open air.

### Battery assembly

A commercially available anode-supported tubular SOFC (Ni-YSZ/YSZ, CoorsTek) (10 mm in OD, 1.25 mm in wall thickness and 40 mm in length) was used as the core component SOEC in the battery. The resultant effective cell surface area is 4.78 cm<sup>2</sup>. A cross-sectional view of the anode/electrolyte microstructure after reduction is shown in Fig.S1, which indicates an

approximately 25  $\mu\text{m}$ -thick YSZ electrolyte on the anode with a reasonably good porosity and pore size. The composite cathode ink consisting of GDC ( $\text{Ce}_{0.8}\text{Gd}_{0.2}\text{O}_2$ ) and LSCF ( $\text{La}_{0.6}\text{Sr}_{0.4}\text{Co}_{0.2}\text{Fe}_{0.8}\text{O}_{3-\delta}$ ) (LSCFGDC-1, Fuel Cell Materials) was applied to the outer surface of the cell and calcined at 1050°C for 1 h in open air. The currents were collected by silver wires attached on the outer surface of the cathode and one end of the anode as shown in Fig.S2. To ensure good electrical contacts, a layer of silver prepared from silver paste (C8829, Heraeus) was coated prior to attaching the silver wires. Served as the transitional part, two  $\text{Al}_2\text{O}_3$  rings were attached to the two ends of the cell. The battery cell was finally cement-mounted onto two long  $\text{Al}_2\text{O}_3$  tubes in which  $\text{Fe}_2\text{O}_3\text{-ZrO}_2$  pellets were installed close to the inlet end of the battery cell. After a full reduction, the Fe loading is determined to be 0.1064 grams from initial  $\text{Fe}_2\text{O}_3/\text{ZrO}_2$  loading, due to limited space in our lab-scale battery prototype. The volume of the enclosed loop in the fabricated battery cell is approximately 81.5  $\text{cm}^3$ . Fig.S3 shows a schematic view of the assembled battery cell.

### **Test setup and methodology**

Fig.S4 shows the flow block diagram of the battery test setup. Overall, it consists of three major components: the battery cell, circulating pump, and a set of toggle valves. By turning off and on certain toggle valves, a closed-loop circulation can be created by the pump. The flow rates of all the gases used ( $\text{N}_2$ ,  $\text{H}_2$  and Air) were controlled by the mass flow controllers (MFCs). The desirable  $\text{H}_2\text{O}$  contents were obtained by passing the carrier gas  $\text{N}_2$  or  $\text{H}_2$  through a bubbler heated to a fixed temperature. An on-line humidity sensor (Vaisala model 332) was deployed to measure the real-time steam content in the gas phase. To prevent condensation, all pipelines were

heat-wrapped and kept at 150°C. A Solartron 1260/1287 Electrochemical System (not shown in Fig.S4) was employed to measure the electrical performance of the battery with software modules such as OCV (open circuit voltage)-t, impedance spectroscopy, potential-dynamic and galvanic square wave.

A typical characterization procedure can be described as follows. Pure N<sub>2</sub> is first used to purge the entire pipe system several times to remove any possible residual air in the circulation loop. The battery is then heated up to the target temperature of 800°C with a ramp rate of 3°C/min and 200-sccm air and 90-sccm 5% H<sub>2</sub>-N<sub>2</sub> flowing outside and inside of the battery cell, respectively. During this period, the open-circuit voltage is constantly monitored while NiO in the anode and Fe<sub>2</sub>O<sub>3</sub> in the redox cycle unit are being at least partially reduced. After reaching 800°C, 5% H<sub>2</sub>-N<sub>2</sub> is then gradually switched to 90 sccm dry H<sub>2</sub> to complete the reduction of all Fe<sub>2</sub>O<sub>3</sub> into Fe, which becomes the starting point of each battery test. Nitrogen is the primary carrier gas for bringing the steam into the redox cycle unit where oxidation of Fe takes place, producing H<sub>2</sub> for the discharge cycle. At each H<sub>2</sub>O concentration, OCV-t, impedance spectroscopy, V-I characteristic and galvanic square wave are conducted before H<sub>2</sub> is introduced to reduce the oxidized Fe back to Fe for the next-round characterization. To ensure no H<sub>2</sub> is left in the pipeline, H<sub>2</sub>O-bore N<sub>2</sub> is allowed to purge through for 1 minute (obviously some produced H<sub>2</sub> could be lost during the purge) before the measurement starts. Upon circulation, the outlet and inlet toggle valves are sequentially shutoff, immediately followed by turning on the pump. The pump was set to a pre-calibrated flow rate of 90 sccm N<sub>2</sub>-flow.

Fig.S5 shows charge/discharge curves recorded in a stagnant gas. Evidently, after just a few cycles, the battery performance decayed rapidly, particularly for the charging cycle, indicating the importance of dynamic flow of the gas phase.

## Thermodynamic analysis

The chemical compositions of H<sub>2</sub>-H<sub>2</sub>O and N<sub>2</sub>-H<sub>2</sub>O mixtures equilibrated with Fe and FeO at 800°C were analyzed with HSC Chemistry software (Outokumpu Research Oy) and are plotted in Fig.S6. For N<sub>2</sub>-H<sub>2</sub>O inlet gas, Fig.S6 (a), the equilibrium composition features a constant H<sub>2</sub>/H<sub>2</sub>O ratio of 65.1:34.9. The higher the H<sub>2</sub>O content in the inlet gas, the more H<sub>2</sub> is produced. For H<sub>2</sub>-H<sub>2</sub>O inlet gas, Fig.S6 (b), any composition higher than H<sub>2</sub>/H<sub>2</sub>O=65.1/34.9 will maintain its original gas composition, *i. e.*, Fe is not oxidizable at this condition whereas any composition lower than H<sub>2</sub>/H<sub>2</sub>O=65.1/34.9 will be equilibrated at the constant H<sub>2</sub>/H<sub>2</sub>O=65.1/34.9 ratio.

Fig.S7 shows the E<sub>N</sub> as a function of p<sub>H<sub>2</sub>O</sub>/p<sub>H<sub>2</sub></sub> at 800°C. With the calculated p<sub>H<sub>2</sub>O</sub>/p<sub>H<sub>2</sub></sub> for both Fe-FeO and FeO-Fe<sub>3</sub>O<sub>4</sub> equilibria, for example, the E<sub>N</sub> values are 0.970 and 0.938 volts, respectively. The observed E<sub>N</sub>= 0.970 volt during the battery testing is a clear indication of Fe-FeO equilibrium being a stable redox-couple in the redox cycle unit.

Fig.S8 compares (a) Nernst potential E<sub>N</sub> and (b) specific energy density (SED) among several transition metal-oxide redox-couples at different temperatures. Clearly, the redox couples containing metals with a greater oxygen affinity exhibit higher E<sub>N</sub> and SED because of the higher (-ΔG) values.

## Calculations of energy capacity and Fe utilization

The total charge stored in Fe, full discharge time, and Fe utilization are, respectively, estimated from the following equations:

$$\text{Total charge } Q_{\text{Fe}}^* \text{ (Coulomb) stored in Fe: } Q_{\text{Fe}}^* = \frac{W_{\text{Fe}}}{M_{\text{Fe}}} \times 2 \times F \quad (\text{S1})$$

$$\text{Full discharge time } t_{\text{Fe}}^* \text{ (sec): } t_{\text{Fe}}^* = \frac{Q_{\text{Fe}}^*}{I_d} \quad (\text{S2})$$

$$\text{Fe utilization } U_{\text{Fe}}: U_{\text{Fe}} = \frac{Q_{\text{Fe}}}{Q_{\text{Fe}}^*} = \frac{t_{\text{Fe}}}{t_{\text{Fe}}^*} \quad (\text{S3})$$

where  $W_{\text{Fe}}$  (g) and  $M_{\text{Fe}}$  (g/mole) are the actual weight and atomic weight of Fe, respectively;  $I_d$  is the galvanic discharge current in amperes;  $Q_{\text{Fe}}$  and  $t_{\text{Fe}}$  are the measured charge capacity (Coulomb) and actual cycle time (seconds), respectively. At 50 mA/cm<sup>2</sup> (or 0.239 A with an effective cell surface area of 4.78 cm<sup>2</sup> used in this study), the full discharge time for 100% utilization of 0.1064 gram of Fe is roughly 26 minutes. A 10-minute discharge cycle shown in Fig. 4 infers 38.5% of Fe utilized during the discharge cycle.

## Figure captions

Fig.S1 Cross-sectional microstructural view of an anode-supported tubular SOEC employed in this study

Fig.S2 A single battery cell subassembly

Fig.S3 A single battery assembly with an integrated redox-cycle unit

Fig.S4 A flow block diagram of test configuration for the battery

Fig.S5 Charge and discharge characteristics of the battery measured at 800°C and  $J=50 \text{ mA/cm}^2$  in a closed stagnant gas of 53.2%  $\text{H}_2\text{O-N}_2$ . Single-cycle period is 10-minute.

Fig.S6 Calculated equilibrium gas compositions of (a)  $\text{N}_2\text{-H}_2\text{O}$  and (b)  $\text{H}_2\text{-H}_2\text{O}$  systems reacting with Fe and FeO at 800°C

Fig.S7 Calculated Nernst potential as a function of  $p_{\text{H}_2\text{O}}/p_{\text{H}_2}$  at 800°C

Fig.S8 Comparison of  $E_N$  (a) and specific energy density (SED) (b) among several transition metal-oxide redox-couples at different temperatures

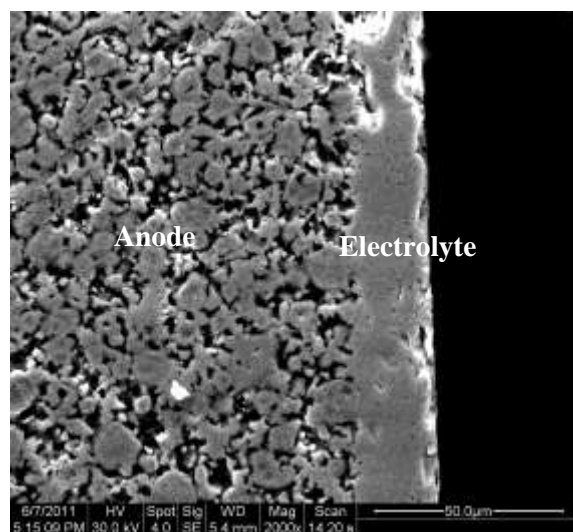

Fig.S1 Microstructure of an anode-supported tubular SOEC employed in this study

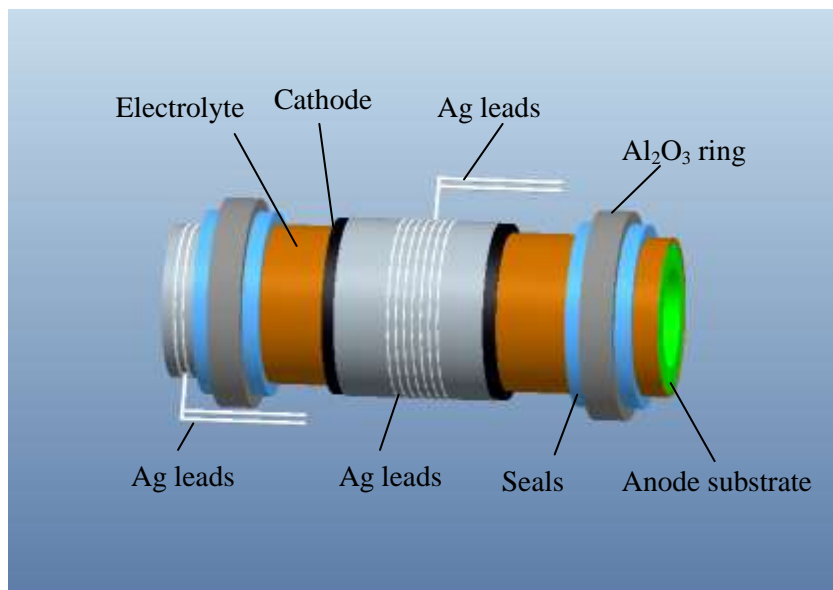

Fig.S2 A single battery cell subassembly



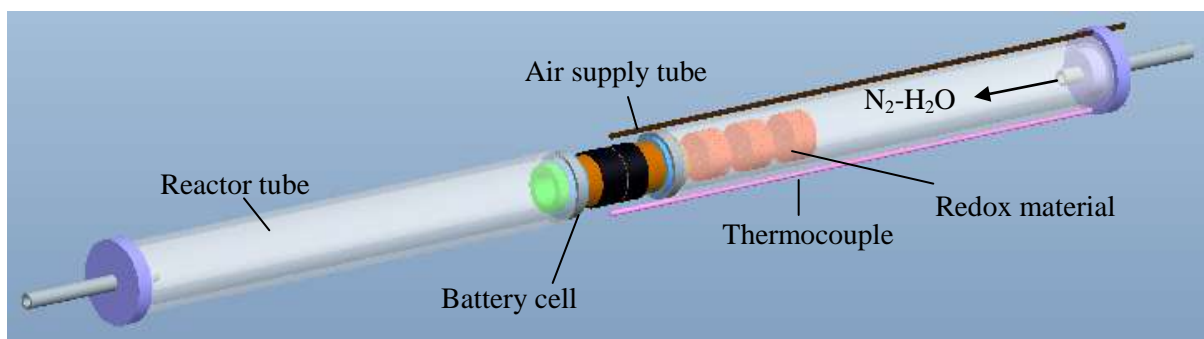

Fig.S3 A single battery assembly with an integrated redox-cycle unit

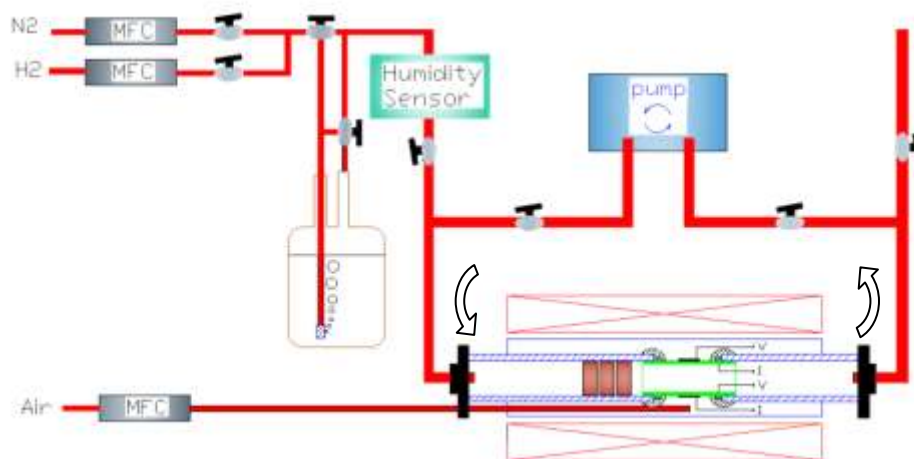

Fig.S4 A flow block diagram of test configuration for the battery

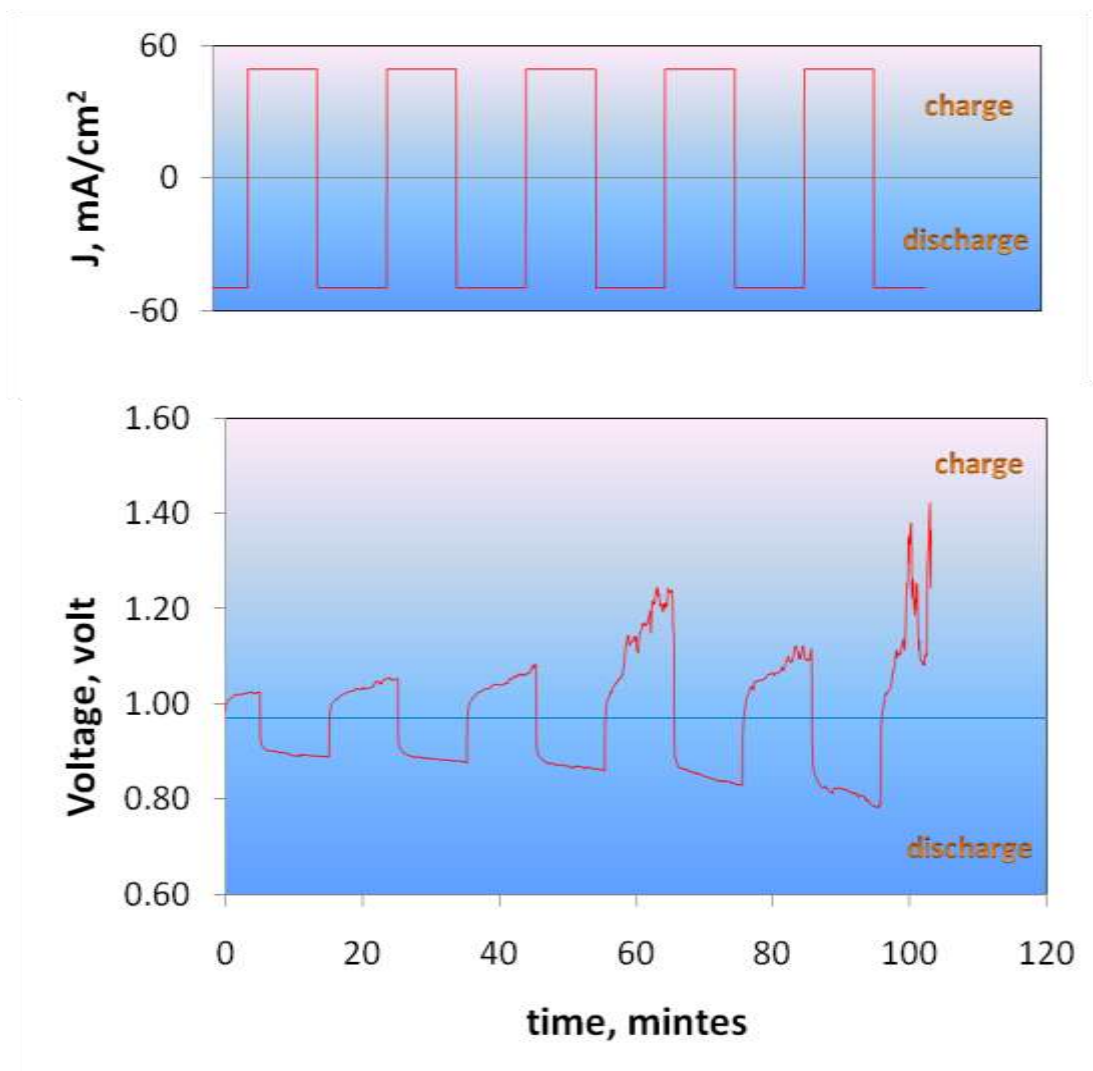

Fig.S5 Charge and discharge characteristics of the battery measured at  $800^\circ\text{C}$  and  $J=50 \text{ mA}/\text{cm}^2$  in a closed stagnant gas of  $53.2\% \text{H}_2\text{O}-\text{N}_2$ . Single-cycle period is 10-minute.

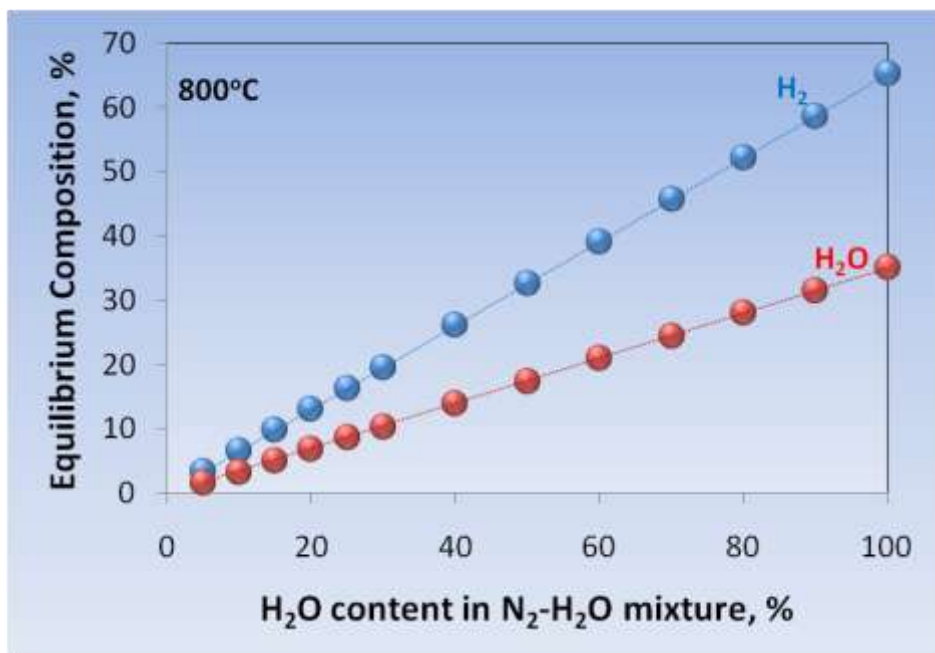

(a)

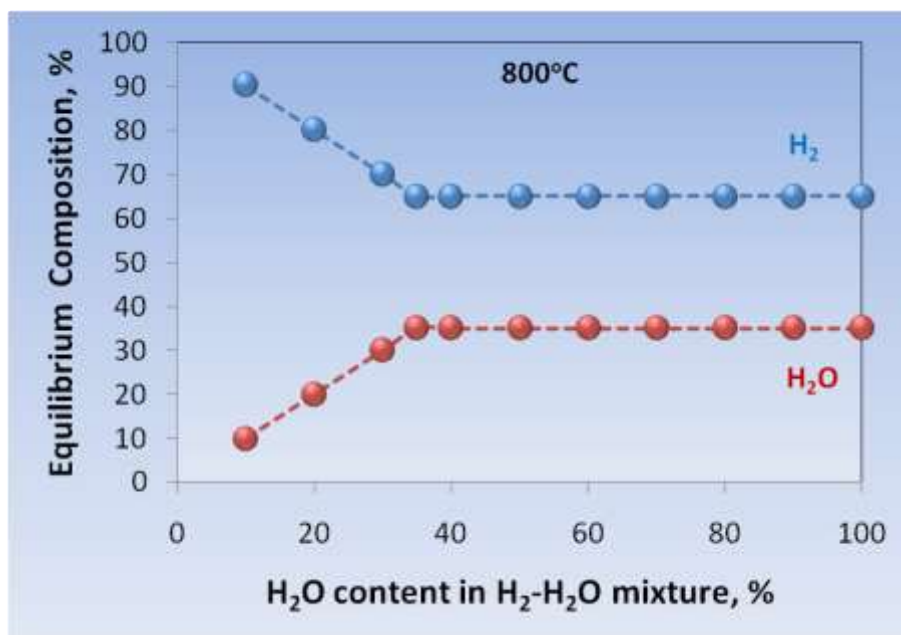

(b)

Fig.S6 Calculated equilibrium gas compositions of (a) N<sub>2</sub>-H<sub>2</sub>O and (b) H<sub>2</sub>-H<sub>2</sub>O systems reacting with Fe and FeO at 800°C

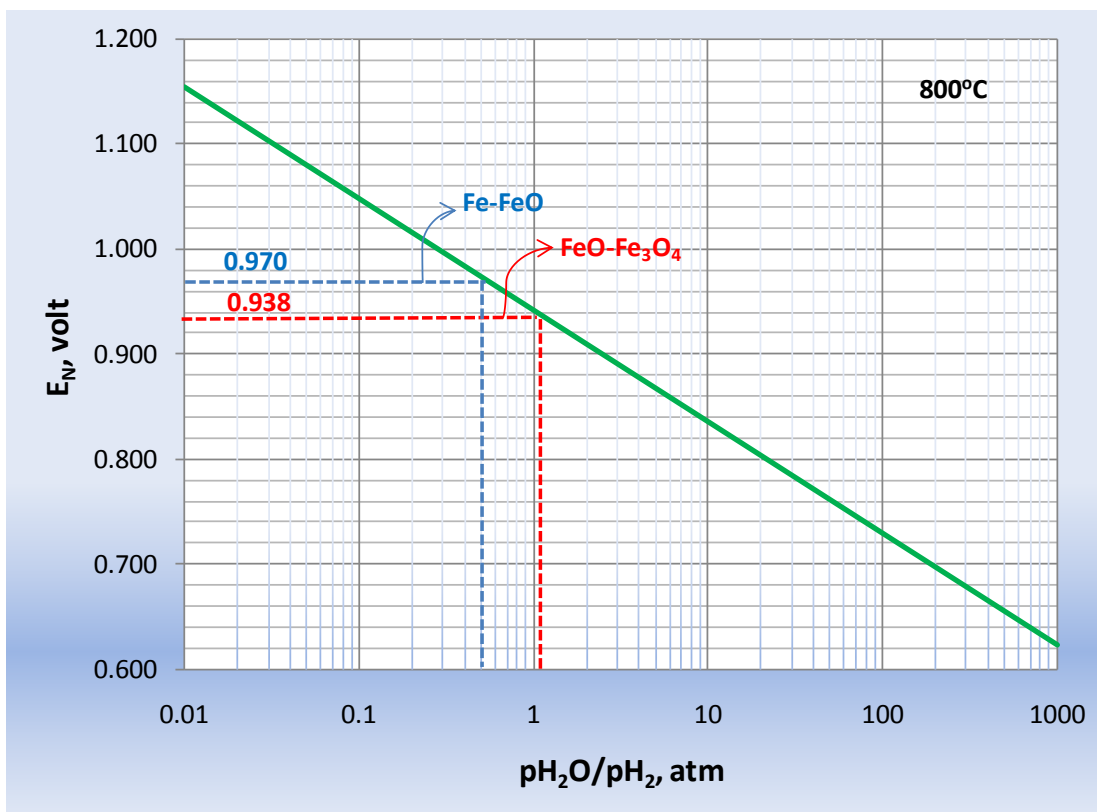

Fig.S7 Calculated Nernst potential as a function of  $p_{H_2O}/p_{H_2}$  at  $800^\circ\text{C}$

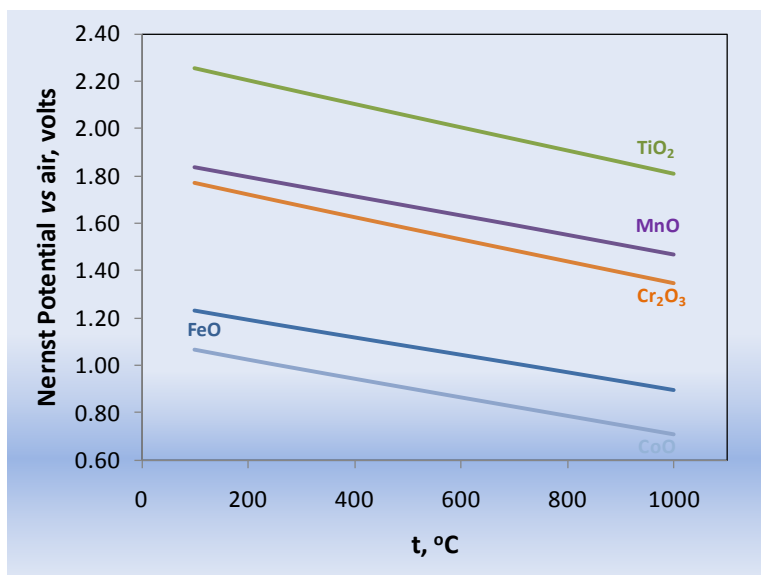

(a)

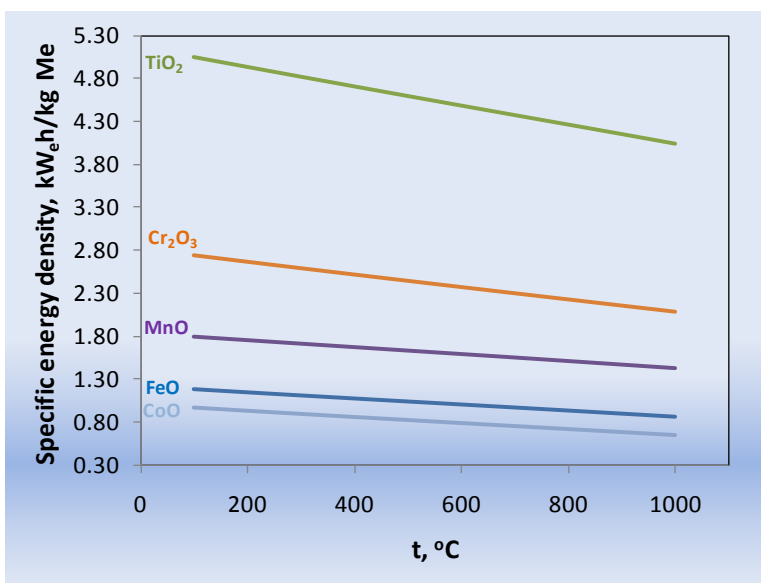

(b)

Fig.S8 Comparison of  $E_N$  (a) and specific energy density (SED) (b) among several transition metal-oxide redox-couples at different temperatures
